1 **Liver Organoid and T Cell Coculture Models Cytotoxic T Cell Responses against Hepatitis C Virus**

2 Vaishaali Natarajan<sup>§,1</sup>, Camille R Simoneau<sup>§,1,2</sup>, Ann L Erickson<sup>§,3</sup>, Nathan L Meyers<sup>1</sup>, Jody L Baron<sup>4,5</sup>,  
3 Stewart Cooper<sup>3,4,\*</sup>, Todd C McDevitt<sup>1,6,\*</sup>, Melanie Ott<sup>1,4,5,\*</sup>

4

5 <sup>1</sup>The Gladstone Institutes, San Francisco, CA, USA

6 <sup>2</sup>Biomedical Sciences Graduate Program, University of California San Francisco, San Francisco, CA,  
7 USA

8 <sup>3</sup>Division of General & Transplant Hepatology, California Pacific Medical Center & Research Institute,  
9 San Francisco, CA, USA

10 <sup>4</sup>UCSF Liver Center

11 <sup>5</sup>Department of Medicine, University of California San Francisco, San Francisco, CA, USA

12 <sup>6</sup>Department of Bioengineering & Therapeutic Sciences, University of California San Francisco, San  
13 Francisco, CA, USA

14

15 <sup>§</sup>authors contributed equally

16 <sup>\*</sup>Co-corresponding authors

17

18 **Abstract**

19 Hepatitis C virus (HCV) remains a global public health challenge with an estimated 71 million people  
20 chronically infected, with surges in new cases and no effective vaccine. New methods are needed to  
21 study the human immune response to HCV since *in vivo* animal models are limited and *in vitro* cancer  
22 cell models often show dysregulated immune and proliferative responses. Here we developed a CD8<sup>+</sup> T  
23 cell and adult stem cell liver organoid system using a microfluidic chip to coculture 3D human liver  
24 organoids embedded in extracellular matrix with HLA-matched primary human T cells in suspension. We  
25 then employed automated phase contrast and immunofluorescence imaging to monitor T cell invasion  
26 and morphological changes in the liver organoids. This microfluidic coculture system supports targeted  
27 killing of liver organoids when pulsed with a peptide specific for HCV nonstructural protein 3 (NS3)  
28 (KLVALGINAV) in the presence of patient-derived CD8<sup>+</sup> T cells specific for KLVALGINAV. This

29 demonstrates the novel potential of the coculture system to molecularly study adaptive immune  
30 responses to HCV in an *in vitro* setting using primary human cells.

31

## 32 **Introduction.**

33 Hepatitis C virus (HCV) is a positive-sense single-stranded RNA virus which targets hepatocytes,  
34 usually establishes chronic infection and, untreated, can progress to cirrhosis and hepatocellular  
35 carcinoma<sup>1</sup>. About 20% of patients clear infections spontaneously, but the remainder establish a lifelong  
36 infection, which is often not diagnosed until severe liver disease has occurred<sup>2</sup>. While the incidence of  
37 HCV in the United States has remained lower than in some other regions, the opioid epidemic has led to  
38 an increase in HCV cases due to needle sharing<sup>3</sup>. Despite the recent introduction of direct-acting  
39 antivirals against HCV, the global disease burden remains high, related to lack of access to treatment,  
40 expense of drugs, and the possibility of reinfection after successful treatment is completed<sup>4</sup>. In addition,  
41 despite a sustained virologic response (SVR), the risk of hepatocellular carcinoma in patients treated  
42 when advanced fibrosis was present remains higher in previously HCV-infected individuals compared to  
43 those who have never been infected<sup>5</sup>. This underscores the need for an effective vaccine, the  
44 development of which has been hampered by the high mutation rate of the virus and the lack of broadly  
45 neutralizing antibody induction after natural infection or vaccination strategies<sup>6</sup>.

46 HCV demonstrates limited tropism and can productively infect chimpanzees and humans only<sup>7</sup>.  
47 The dynamics of the immune response to HCV have been well studied in chimpanzee models, which  
48 show that CD8+ and CD4+ T cells play an important role in the control of HCV infection<sup>2,8</sup>. Although anti-  
49 HCV antibodies are produced, they do not protect against reinfection, and notable is that patients with  
50 congenital agammaglobulinemia have been able to spontaneously resolve acute hepatitis C<sup>9</sup>. However,  
51 the most recent human vaccine trial that succeeded in eliciting anti-HCV T cell responses did not offer  
52 any protection against chronic HCV infection<sup>10</sup>.

53 With chimpanzees no longer available for animal studies, there is an urgent need for laboratory  
54 models of HCV immunity. However, physiologically relevant laboratory models of HCV have been

55 challenging to establish as primary human hepatocytes do not sustain long-term culture due to rapid  
56 dedifferentiation *in vitro*, and thus cannot be chronically infected with HCV<sup>11</sup>. Therefore, most research  
57 has relied on viral strains that can robustly replicate in various subclones of the Huh7 hepatoma cell  
58 lines<sup>12-14</sup>. However, the genetic perturbations in the antiviral interferon response that make Huh-7 cells  
59 highly permissive to HCV infection, also result in dysfunctional innate immune defenses, preventing  
60 accurate modeling of HCV immunity<sup>12</sup>. In addition, Huh7 cells lack proper cellular polarity and therefore  
61 demonstrate a non-physiological distribution of the surface receptors exploited by HCV for cell entry<sup>12</sup>.

62         Exciting recent developments in organoid technologies have enabled the creation of liver  
63 organoids from pluripotent and adult stem cells that replicate key structural and functional features of the  
64 organ and therefore can be employed for modeling HCV infection in the liver. Adult stem cells (ASCs)  
65 derived from the liver can be grown in a defined culture condition to robustly generate 3D liver organoids  
66 that can be maintained in culture without developing a senescent phenotype for multiple months<sup>15-17</sup>.  
67 Long-term culture of liver organoids can be initiated through selection of epithelial cellular adhesion  
68 molecule (EpCAM)<sup>+</sup> cells from liver biopsies because the EpCAM<sup>+</sup> compartment of the liver cells is  
69 enriched for ASCs.

70         ASC-derived liver organoids retain cell polarity rendering them highly suitable for the study of  
71 HCV entry and replication<sup>18</sup>. Embryonic stem cell (ESC)- and induced pluripotent stem cell (iPSC)-derived  
72 hepatic organoids have been successfully infected with clones of JFH1, a genotype 2a HCV strain, and  
73 with primary isolates of HCV<sup>19-21</sup>. Since paired liver and blood samples can be obtained from ASC donors,  
74 ASC-derived organoids are well suited for the studies of host-pathogen interactions and the immune  
75 response to infection and cancer in an autologous coculture setting<sup>22,23</sup>.

76         Here, we employ a static microfluidic chip to emulate the physiological interaction between a solid  
77 tissue, the liver, and the T cells in circulation. ASC-derived liver organoids are embedded in extracellular  
78 matrix within the central channel of a microfluidic chip and the CD8<sup>+</sup> T cells suspended in media in  
79 adjacent, inter-connected microfluidic channels. The fluidics configuration can be manipulated to drive  
80 the T cells from media towards the central channel where the liver organoids are contained. We

81 generated an HCV A0201-KLVALGINAV (NS3 aa1406-1415) CD8<sup>+</sup> T cell clone and matched it with a  
82 liver organoid donor to allow coculture. Coculture in the microfluidics chip enabled the real-time imaging  
83 to monitor the organoid/T cell interactions, and precise control over cellular interactions through  
84 modulation of culture parameters, including flow rate and soluble factor gradients. This coculture system,  
85 which recapitulates immune cell dynamics in liver tissue microenvironments, represents a powerful new  
86 tool to model critical cellular features of HCV immunity.

87

## 88 **Results**

### 89 1. Adult stem cell-derived liver organoids express HLA class I

90 ASC-derived organoids were grown from liver samples obtained from clinical resection  
91 procedures, as previously described<sup>15</sup>. The resulting organoids consist mostly of a single epithelial cell  
92 layer surrounding a hollow center; in the stem-cell state, liver organoids can be maintained and expanded  
93 in basement membrane extract (BME) for at least four months without loss of viability<sup>18</sup>. Antigen  
94 presentation on the surface of a target cell is required for T cell interaction to initiate a primary immune  
95 response. Thus, to test whether liver organoids could function as antigen-presenting cells, the levels of  
96 the class I HLA markers, HLA-A, -B, -C, were measured by quantitative RT-PCR (Fig. 1A). We compared  
97 HLA expression in organoids obtained from HCV- and HCV+ donors, and observed no significant  
98 difference between the levels of expression based on viral status, as has been previously shown<sup>24</sup>. To  
99 determine the polarity of HLA class I expression, we used light sheet microscopy to examine the entire  
100 organoid (~200 μm diameter) and stained for beta-2 microglobulin, a component of conformationally and  
101 functionally mature HLA class I complexes. These analyses indicated that beta-2 microglobulin was  
102 readily expressed and localized on the “outside”, basolateral surface of the organoids (Fig. 1B).

103 Next, we tested whether CD8<sup>+</sup> T cells could recognize and react to the HLA class I molecules on  
104 the surface of the organoids. CD8<sup>+</sup> T cells were isolated from healthy blood donors and cultured overnight  
105 in the presence of interleukin-2 (IL-2) before incubating the T cells with allogenic organoids for 5 hours  
106 in a well-based assay without embedding the organoids in BME (Fig. 1C). Incubation with the allogenic



107 organoids induced robust expression of interferon-gamma (IFN- $\gamma$ ), a proinflammatory cytokine, and of  
108 CD107a, a degranulation marker (Fig. 1D). Induction by organoids was similar to the induction by phorbol  
109 esters (PMA) combined with ionomycin, which is a strong T cell-activating stimulus. Collectively, these  
110 observations indicate that the organoids act as efficient antigen-presenting cells for CD8<sup>+</sup> T cells.

111 As HCV entry occurs via multiple surface-expressed receptors, we confirmed the expression of  
112 HCV receptors CD81, claudin, occludin and scavenger receptor B1 (SRB1) in liver organoids. No  
113 significant difference in CD81 or occludin transcript levels was observed between donors; however,  
114 claudin mRNA expression was on average higher and SRB1 lower in HCV-negative samples. (Fig 1E).  
115 Due to the expression of functional HLA class I and HCV receptors on the organoid cell surface, we  
116 conclude that these organoids have the required proteins to model T cell interactions in the context of an  
117 infection.

118

119 2. Generation and characterization of the HCV A0201- KLVALGINAV (NS3 aa1406-1415) CD8<sup>+</sup> T cell  
120 clone.

121 To model antigen-mediated killing of virally infected cells, we generated T cell clones that could  
122 specifically recognize distinct HCV peptide antigens presented by liver organoid cells (Fig 2A). To that  
123 end, the HCV NS3 protein contains numerous immunologically relevant epitopes, including the HLA-  
124 A0201-restricted peptide, KLVALGINAV (aa 1406–1415)<sup>25,26</sup>. We therefore isolated CD8<sup>+</sup> T cells  
125 specific for the KLVALGINAV peptide from an individual who spontaneously resolved HCV. The antigen-  
126 specific T cell population was sorted from peripheral blood using an HLA-A0201-KLVALGINAV tetramer  
127 (Figure 2B). Individual CD8<sup>+</sup> T cells clones were expanded in culture with irradiated allogeneic peripheral  
128 blood mononuclear cells (PBMC), anti-CD3 antibodies and recombinant IL-2. The expanded CD8<sup>+</sup> T cell  
129 clones were assessed for antigen specificity in a chromium release assay against HLA-A0201-expressing  
130 targets pulsed with either the A0201-KLVALGINAV peptide or an HLA-A0201-restricted control peptide.  
131 A representative chromium release assay using one of the clones, SR01-78, is shown in Figure 2C

132 (orange and grey lines). To confirm that clone SR01-78 also reacted to the endogenously processed  
133 KLVALGINAV antigen, the HLA-A0201-expressing target cells were infected with a recombinant vaccinia  
134 virus expressing the HCV NS3 (vvNS3) protein or with wild-type vaccinia virus (vvWT). This experiment  
135 demonstrated that clone SR01-78 reacted not only to exogenously loaded KLVALGINAV but also to the  
136 endogenously processed antigen (Fig. 2C, blue and purple lines).

137

### 138 3. Culture of liver organoids and CD8<sup>+</sup> T cells in a microfluidic chip

139 Previous reports have used simple well-based or droplet-based coculture of T cells with organoid  
140 cultures in a cancer immunity context as we have done in our pilot results in Figure 1<sup>22</sup>. Lack of BME  
141 embedment in the traditional well-based assay renders it unsuitable for long-term cultures of liver  
142 organoids as the extracellular matrix is essential for the maintenance of organoid structure, viability and  
143 polarity. On the other hand, the conventional droplet based coculture supports long-term organoid culture,  
144 but is unsuitable for the temporal study of individual organoids in response to HCV or the presence of  
145 immune cells. Therefore, to establish a tractable coculture of T cells and liver organoids that allows live  
146 monitoring of the interaction and potential killing over time, we used a commercially available microfluidic  
147 chip device (Fig. 3A)<sup>27</sup>. This contains a central channel where organoids can be embedded in basement  
148 membrane extract (BME), and flanking media channels on the top and bottom where media and T cells  
149 can be introduced. The content of the central channel remains contained while interstitial flow is permitted  
150 between the flanking media channels. A pressure difference is created and maintained between the  
151 media channels via differential media volume reservoirs connected to the channels to ensure transverse  
152 interstitial flow of media across the central channel. T cells added into the higher-pressure channel can  
153 thus be moved through the central channel by this transverse flow. This system therefore allows  
154 controlled entry of T cells into the central channel. Since the microfluidic chip also functions as a  
155 microscopy slide, it enables convenient tracking of T cell:organoid interactions via live, brightfield and  
156 fluorescence microscopy. We used phase contrast microscopy for tracking and morphological

157 characterization of organoids, and fluorescence microscopy to quantify T cells labeled with a fluorescent  
158 dye (CellTracker Green).

159

#### 160 4. Optimization of coculture media conditions.

161 T cells are typically cultured in RPMI mammalian cell culture medium supplemented with 10%  
162 fetal bovine serum (FBS). In contrast, liver organoids are cultured in Dulbecco's Modified Eagle Medium  
163 (DMEM), which lacks several components of RPMI but also requires agonists for the Wnt and Notch  
164 signaling pathways to support organoid growth<sup>15</sup>. Importantly, organoids are usually cultured without the  
165 addition of FBS since the abundant soluble factor signals in FBS can trigger heterogenous differentiation  
166 of the ASC-derived liver organoids. Therefore, to determine which medium would be optimal for the  
167 coculture system, we tested the individual viabilities of T cells and liver organoids when monocultured in  
168 organoid medium (or EM), the T cell RPMI medium and a 1:1 mixture of both. We set up monocultures  
169 of either T cells or liver organoids in the microfluidic chips and monitored the viability of cells through  
170 microscopy. The viability of T cells was tracked by fluorescent imaging in the microfluidic device with the  
171 addition of DRAQ7 viability dye, which enables *in situ* labeling of nonviable cells. We quantified  
172 CellTracker<sup>+</sup> or DRAQ7<sup>+</sup> cells to calculate the fraction of viable or nonviable T cells, respectively. T cells  
173 maintained similar viabilities (>75%) in all three culture conditions over a 60-hour period with no  
174 statistically significant difference between the RPMI or EM media (Fig. 3B). For organoids, phase contrast  
175 imaging and morphological characterization were employed to quantify viability. Organoids with a  
176 spherical shape and good epithelial integrity were classified as viable, whereas liver organoids with  
177 irregular shape and loss of growth, as indicated by the red outline, were deemed nonviable organoids  
178 (Fig. 3C). After 60 hours in RPMI media, organoid viability dropped to below 25%, while remaining above  
179 75% in the EM media. A 1:1 mix of both media remained below 50% viability. Thus, EM media was  
180 chosen for use in subsequent coculture studies as it supported both T cell and organoid survival.

181

182

## 183 5. Coculture of organoids and T cells

184           Once the optimal media conditions were determined in independent monocultures, the organoid:T  
185 cell cultures was cocultured in the microfluidic chip (Fig. 4A). Liver organoids under 100  $\mu\text{m}$  in diameter  
186 were mixed with BME and added to the fenestrated central channel resulting in a spatially stable  
187 distribution of the organoids. The A0201-KLVALGINAV CD8<sup>+</sup> T cells, pre-stained with Celltracker Green,  
188 were added to one of the flanking media channels in EM culture media followed by continuous media  
189 flow through both channels (Fig, 4A). T cells migrated through the gaps in the fenestrated central lane in  
190 the presence of a non-targeting peptide with numbers reproducibly increasing over the 60-hour  
191 observation period (Fig. 4B). Organoid viability in the central channel remained stable with a modest, but  
192 non-significant decrease over the 60 hour-time period. This indicates that T cell coculture and peptide  
193 pulsing are not inherently toxic to the liver organoids.

194

## 195 6. T cell response to HCV peptide-pulsed organoids

196           To determine whether the cloned T cells recognize and kill organoids expressing their cognate  
197 peptide, organoids were pulsed with the KLVALGINAV HCV-specific peptide and then loaded into the  
198 central channel, while A0201-KLVALGINAV-specific T cells were added in the media channel.  
199 Microscopy images were acquired at 15, 40 and 60 hours after the start of the coculture with  
200 representative images shown (Fig 5A). At 40 hours, peptide-pulsed organoids showed a more than 10-  
201 fold decrease in viability compared to the organoids not pulsed with the HCV peptide ( $p < 0.001$ ) (Fig  
202 5B). At 60 hours, 80% of the organoids were deemed non-viable in the peptide-pulsed conditions while  
203 only 15% cell death was recorded in the control condition ( $p < 0.001$ ) (Fig. 5B). When we counted the  
204 number of T cells that had migrated into the central channel to confirm that the increase in cell death in  
205 the peptide-pulsed condition was not simply due to more T cells entering the central channel, we found  
206 a higher number of T cells in the control condition, excluding this possibility (Fig, 5C).

207 We repeated this experiment with various effector T cell to target organoid ratios. We tested a 100x, 20x  
208 and 5x excess of T cells compared to liver organoids in the coculture experiment. Addition of T cells at

209 varying effector to target ratios influenced the level of killing (Fig 5C). Overall, the final percentage of cell  
210 death correlated with the number of T cells added into the experiment but a 5:1 effector to target ratio  
211 took longer to reach the 50% viability limit. At this ratio, 50% of the peptide-pulsed organoids died only  
212 after 80 hours, compared to the 100:1 ratio, which induced 50% cell death at 40 hours (Fig. 5C). A high  
213 ratio (100:1) increased the dynamic range between the peptide-pulsed and control co-cultures likely  
214 because –unlike in a well-based coculture system– not all T cells access the central channel and not all  
215 T cells in the central channel contact the organoids due to the presence of the extracellular matrix,  
216 necessitating a higher number of input effector cells.

217

## 218 Discussion

219 We report the establishment of a tractable coculture system of liver organoids and antigen-specific  
220 T cells, which we envision could be applied towards identifying immunogenic HCV epitopes that lead to  
221 T cell-mediated killing of virally infected liver cells. We report here that organoid medium is suitable for  
222 coculture of the two cell populations in a microfluidic device that enables the spatial and temporal analysis  
223 of individual organoid responses by imaging. Using a novel HCV antigen-specific CD8<sup>+</sup> T cell clone, we  
224 quantify functional T cell activity and specific killing of peptide-presenting liver organoids in the device  
225 using common light and fluorescent microscopy equipment and commercially available quantification  
226 programs. Parallel work in our lab has shown that ASC-derived liver organoids can be infected with  
227 patient-derived isolates of HCV, so we expect this system to provide a new platform to study T:liver cell  
228 interactions in a physiological, individualized *in vitro* setting. The system could also prove useful to test  
229 effectiveness of chimeric antigen receptor (CAR) T cells in the context of liver infections and liver cancer,  
230 and of recently developed neoantigen directing TCR/anti-CD3 fusion proteins<sup>28,29</sup>.

231 Liver organoids are typically cultured by mixing individual or small aggregates of cells embedded  
232 in small droplets of BME. The stochastic, heterogeneous distribution of organoids throughout the  
233 relatively large BME droplets makes it challenging to observe the response of individual organoids to  
234 infection and presence of T cells. Distribution of organoids in different planes of focus in the droplets

235 make it difficult to compare and contrast individual organoids directly. In addition, the droplet system also  
236 lacks ease of registry of individual organoids thereby rendering their longitudinal monitoring inherently  
237 challenging. In contrast, studies in the microfluidic chip-based platform enables spatial and temporal  
238 observation of individual organoids. The fixed orientation of organoids due to embedment in BME and  
239 the monoplanar distribution due to the thin height configuration of the device channels yields a relatively  
240 uniform horizontal distribution of organoids. In addition, T cells suspended in culture media can traverse  
241 freely through the device and encounter the immobilized organoids. Collectively, this configuration  
242 enables longitudinal monitoring and preserves the heterogeneity in biological responses of both the  
243 organoids and T cells.

244 T cells are independently introduced into the system by suspension in culture media, thus  
245 mimicking the perfusion of blood entering a tissue. By establishing a lateral pressure gradient across the  
246 chip, T cells and media flow in a uni-directional manner through the central channel, which is laden with  
247 the matrix-embedded organoids. This spatiotemporal controlled coculture system allows for the selective  
248 study of T cells that are able to penetrate the extracellular matrix microenvironment of the central lane  
249 and interact with the liver organoids. In addition, parameters such as the ratio of T cells to organoid cells  
250 and persistence of interaction between the two cell types can be evaluated. Lastly, the device  
251 configuration allows for comparative analysis between T cells that interact with the organoids and the  
252 ones that fail to interact and remain in either of the media channels. Collectively, this system can identify  
253 specific T cell populations with improved or targeted cellular cytotoxic response towards HCV.

254 As a model of CD8<sup>+</sup> T cell response to infection, we chose an immunogenic peptide from the HCV  
255 NS3 protein (NS3 coordinates 1406-1415), a key multifunctional enzyme required for viral replication<sup>30</sup>.  
256 Analysis of the livers and PBMCs of patients with chronic HCV infection demonstrated that approximately  
257 75% of patients harbored CD8<sup>+</sup> cytotoxic T cells specific to epitopes located within the NS3 protein<sup>31</sup>. Our  
258 study underscores the immunological function that NS3-specific epitopes, here KLVALGINAV, can play  
259 in the host response to HCV infection based on the effective cell killing induced by pulsing with the  
260 epitopic peptide. Because viral induced liver damage could be mediated both by direct infection of

261 parenchymal cells as well as immune cell cytokine release, the addition of highly reactive immune cells  
262 is essential for modeling liver damage during HCV infection. By pairing immune competent cells with  
263 adaptive immune cells, we have established a system to explore interventions along the liver cell/immune  
264 cell axis. The addition or removal of cytokines, blocking treatments, stimulations of T cells, and other  
265 pharmacological interventions could all be readily modeled in this system to attain a better understanding  
266 of how such interventions affect liver viability.

267         Employing a microfluidic chip with distinct compartments for solid tissue and media channels in  
268 culture preserves the physiological T cell migration and motility behavior in response to varying  
269 chemotactic signals from the liver tissue. Additionally, this compartmentalized culture format allows  
270 incorporation of additional relevant immune or liver cell types, such as NK or Kupffer cells, to understand  
271 their role in HCV infection. With the re-expanding number of cases of HCV globally and domestically, this  
272 novel platform can be used to gain unique insight into HCV immunobiology, potentially accelerating the  
273 already long path towards an effective vaccine.

274

## 275 **Materials and Methods**

### 276 Liver organoid culture

277 Liver organoid culture is initiated by 3D culture of EpCAM+ cells freshly isolated from liver resections,  
278 using methodology previously described<sup>15</sup>. Briefly, bead-sorted EpCAM+ liver cells were mixed with 50  
279  $\mu$ l basement membrane extract (BME2) and cultured in a 24-well plate overlaid with basal media  
280 (Advanced DMEM with 1% glutamax and 1% pen/strep) containing B-27 (50X, ThermoFisher), N-2,  
281 (100X ThermoFisher), 25 ng/ml Hepatocyte Growth Factor (Stemcell Technologies), 50 ng/ml Epidermal  
282 Growth Factor (Stemcell Technologies), 10 nM Gastrin I, 1 mM N-Acetylcysteine (Sigma), 100 ng/ml  
283 Fibroblast Growth Factor-10 (Stemcell Technologies), 10  $\mu$ M Forskolin (Stemcell Technologies), 5  $\mu$ M  
284 A83-01 (Tocris Bioscience) and 1:1000 diluted R-spondin-1 conditioned media. Prolonged culture in the

285 above mentioned format generated multicellular liver organoids. Culture media in the reservoir was fully  
286 replaced 2x/ week and organoids were split 1:4 with TrypLE digestion every 2-3 weeks.

287

### 288 Real-time quantitative PCR

289 RNA was isolated according to manufacturer's directions with the Qiagen RNeasy mini kit. Organoids  
290 were lysed in BME2 with 350  $\mu$ L of buffer RLT, and RNA was extracted according to the manufacturer's  
291 protocol. The isolated RNA was transcribed into cDNA using oligo(dT)<sub>18</sub> primers (Thermo Scientific),  
292 random hexamer primers (Thermo Scientific), and AMV-reverse transcriptase (Promega). Transcripts  
293 were quantified by adding 10 ng of cDNA to a master mix containing 8 pmol of forward and reverse  
294 primers, water and 2X SYBR Green Master Mix (Thermo Scientific) to a total of 10  $\mu$ L. Each assayed  
295 gene was run in triplicate for each sample on an Applied Biosciences thermocycler under the following  
296 conditions: 50°C for 2 minutes, 95°C for 10 minutes, followed by 40 cycles of 95°C for 5 seconds and  
297 60°C for 30 seconds. Gene expression for the target genes was reported relative to the 18S  
298 housekeeping gene.

299

### 300 Light sheet microscopy

301 Organoids were fixed for staining according to a previously published protocol<sup>15</sup>. Briefly, organoids were  
302 removed from the cell culture plate with ice-cold PBS and then were washed 3x with cold PBS to remove  
303 BME2. Organoids were fixed for 30 minutes on ice with 4% paraformaldehyde, washed 3x with cold PBS  
304 and stored at 4 °C for up to two months. Before staining, organoids were blocked with PBS supplemented  
305 with 0.5% Triton X-100, 1% DMSO, 1% BSA, and 1% donkey serum (blocking buffer) overnight at 4°C.  
306 Primary antibody was added at a 1:500 dilution in blocking buffer and incubated at 4°C for 48 hours, and  
307 washed 5x with PBS. Secondary antibodies were added in PBS at a 1:250 dilution and incubated at room  
308 temperature for several hours. Organoids were washed 5x in PBS to remove secondary antibodies and



309 stained with Hoescht for 10 minutes at 1:1000. Organoids were imaged on Zeiss LSM880 Confocal.  
310 Images were processed using a combination of the Zeiss software, ImageJ 1.51f, and Imaris 9.3.

311

### 312 Peptide pulsing of organoids

313 Organoids were removed from BME by addition of cold basal media and washed with additional 10 ml of  
314 cold basal media. The organoids were resuspended in 200  $\mu$ L of PBS with 5  $\mu$ g of either HCV  
315 KLVALGINAV peptide, nonspecific peptide, or no peptide, and incubated at 37°C for 1 hour. At the end  
316 of the incubation period, organoids were washed 2X in basal media, mixed with BME and seeded into  
317 the central lane of the microfluidic chip.

318

### 319 Generation of CD8<sup>+</sup> T cell clone

320 CD8<sup>+</sup> enriched PBMC from HCV spontaneous resolver, SR01, were stained with the A0201-  
321 KLVALGINAV-PE tetramer (NIH tetramer Core Facility, Emory University) and CD8-FITC Ab (BD  
322 Biosciences, San Jose, CA), and sorted on a FACS Aria cell sorter. Tetramer Sorted CD8<sup>+</sup> T cell clones  
323 were established by limiting dilution seeding of A0201-KLVALGINAV sorted CD8<sup>+</sup> T cells at either 3, 1 or  
324 0.3 cells/well in 96-well U-bottom plates along with  $5 \times 10^4$  irradiated allogeneic PBMC feeders, 0.04  
325  $\mu$ g/ml anti-CD3/ml in RPMI medium supplemented with 10% FBS and 40 u/ml rIL2 (Clone Medium).  
326 Plates were cultured at 37°C and 6% CO<sub>2</sub>. Plates were refed every 3-4 days by removing 100  $\mu$ l of clone  
327 medium and replacing with 100  $\mu$ l fresh clone medium. Between days 7-14, clones displaying growth  
328 were transferred into 24-well plates and restimulated with  $2 \times 10^6$  irradiated allogeneic PBMC feeders and  
329 0.4ug anti-CD3/ml in clone medium. Clones were maintained by restimulating every 2-3 weeks with  
330 irradiated allogeneic PBMC feeders and anti-CD3.

331

332

333

334 CD8<sup>+</sup> T cell culture

335 CD8<sup>+</sup> T cell clones were maintained in culture with periodic stimulation (every 2-3 weeks). Briefly, T cell  
336 clones were plated in a 24-well plate at  $1 \times 10^6$  cells/well in RPMI + 10% FBS + 40u/ml rIL2 (clone medium).  
337 Irradiated PBMC feeders ( $2 \times 10^6$ ) from an allogeneic donor were added to each well along with 0.08ug/ml  
338 anti-CD3. Plates were incubated at 37°C and refreshed every 3-4 days with fresh clone medium. When  
339 wells reached confluency, the clones were pooled together and placed in T75 flasks until the next  
340 restimulation. To activate the T cells, they were treated with 0.1mg/ml PMA and 0.5  $\mu$ M ionomycin while  
341 simultaneously treated with BFA and Monensin and incubated for five hours at 37°C.

342

343 Chromium release assay

344 The 721.221 class I MHC deficient cell line transfected with the A0201 Class I MHC molecule served as  
345 targets for the chromium release assay. The A0201 class I transfectant was simultaneously loaded  
346 exogenously with peptides at 10  $\mu$ g/ml concentration and 25  $\mu$ Ci of  $^{51}$ Cr for 1 hour at 37°C. The A0201 targets  
347 were washed 3X and resuspended at  $5 \times 10^4$  cells/ml. Recombinant vaccinia virus (rVV) infected A0201  
348 targets were infected at an MOI of 10:1 for one hour, washed 1X and cultured O/N at 37°C. The next day the  
349 rVV targets were washed and labeled with 25  $\mu$ Ci of  $^{51}$ Cr for 1 hour at 37°C. The clones were seeded at E:T  
350 ratios of 20, 5 and 1:1 in 96-well bottom plates. The targets were added to the clones at 5000 cells/well.  
351 Chromium release assays were incubated for 3-4 hours at 37°C. 50 $\mu$ l supernatant was harvested from each  
352 well and placed in 96-well Luma Plates containing a dry scintillant (Perkin Elmer, Waltham, MA). Dried plates  
353 were counted on a MicroBeta counter (Perkin Elmer, Waltham, MA). Percent specific  $^{51}$ Cr release was  
354 calculated as follows:

355

356  $(\text{Experimental release} - \text{Spontaneous release}) / (\text{Maximum release} - \text{Spontaneous release}) \times 100$

357 Responses were considered positive if the percent specific lysis was twice or more above background at  
358 20:1 and 5:1 E:T ratios.

359 Fluorescent labeling of T cells.

360 T cells were stained with CellTracker Green CMFDA (ThermoFisher Scientific, C2925) for real-time  
361 fluorescence imaging in microfluidic chip. CellTracker staining solution was freshly prepared by diluting  
362 the stock (2mM in DMSO) in prewarmed PBS to a final concentration of 10 $\mu$ M. T cells were washed 2X  
363 in PBS at 400xg for 5 minutes to remove any traces of cell culture media. Following this, the cells were  
364 suspended in the CellTracker staining solution and incubated at 37°C for 30 minutes. Cells were washed  
365 3X to remove unbound dye and resuspended in the appropriate media for the subsequent steps.

366

367 Organoid-T cell coculture in microfluidic chip.

368 Liver organoids and T cells were cocultured in single use, 3D cell culture chips obtained from AIM Biotech  
369 (DAX-1). The microfluidic chips consist of a central channel for the 3D culture of cells embedded in  
370 hydrogel and two flanking channels for introducing media and/or secondary cell type(s). In this study,  
371 liver organoids were cultured in the central channel and the flanking channels were used for cell culture  
372 media exchange or for introducing T cells suspended in media. Both sides of the central channel are  
373 bordered by vertical posts with a triangular base that prevents leaking of content from the central channel  
374 to the flanking channels on either side. Regular gaps between these vertical posts ensure that the  
375 interstitial flow of media from the flanking channels towards the central channel can still occur  
376 uninterrupted. To initiate the coculture in chips, liver organoids were gently dissociated with TrypLE to  
377 obtain organoids of about 75-150 cells each, rinsed 2X in cold basal media to remove any residual BME,  
378 and pulsed with HCV or nonspecific peptides as described in the previous section. Organoids were  
379 resuspended in the appropriate volume of cold EM to generate a final concentration of approximately 20  
380 organoids/ $\mu$ l. Following this, the organoids suspended in EM were mixed with equal volume of BME2 to  
381 bring the final concentration to 10 organoids/ $\mu$ l and placed on ice until loading into chips. 7.5 $\mu$ l of this  
382 organoid suspension was injected into the central channel of the 3D chip using micropipettes by carefully  
383 pipetting in from either one of the media ports without generating any air bubbles. Chips were inspected

384 under the microscope to ensure the organoid suspension was uniformly dispersed throughout the length  
385 of the central channel prior to incubating at 37°C for 15 minutes to allow for complete cross-linking of  
386 BME. For the monoculture conditions, the media channels were loaded with EM warmed to 37°C. For  
387 the coculture conditions, media channels were loaded with T cells suspended in EM at the relevant cell  
388 density. To load only media, 10µl media was carefully pipetted into the left-side media inlet of both top  
389 and bottom flanking channels. Following this, the troughs above the left and right side media-inlet ports  
390 were carefully filled with 80µl media and 50µl media, respectively. Similarly, the bottom media channels  
391 were loaded with 50µl and 40µl media on either side. For the coculture conditions, the required number  
392 of CellTracker stained T cells were suspended in 10ul EM and injected into the top flanking media channel  
393 only. Cell culture media was replaced every 24 hours by carefully aspirating the media out from the  
394 troughs without reaching into the media inlet (Fig. 3A). The microfluidic chips were carefully incubated at  
395 37°C for the entire culture duration. Microfluidic chips along with 3cm petri dishes filled with sterile water  
396 were placed in 1-well plates for easy handling and minimization of evaporation of cell culture media from  
397 the chips.

398

399 *Distinguishing between viable and nonviable liver organoids.*

400 Liver organoids were classified as viable or nonviable at different time points of image acquisition based  
401 on the morphometric analysis of the organoids. Liver organoids were imaged with phase contrast  
402 microscopy through maximum intensity projections of z-stack images obtained across the height of the  
403 central channel. The entire area of the central channel was imaged (10.5mm X 1.3mm), and using the  
404 spatial coordinates, the different tiles were stitched together using the built-in tiling feature of FIJI image  
405 analysis software with an overlap of 5%. At the 0-hour time point, all organoids in the central channel  
406 were traced using the elliptical selection tool in FIJI and the morphology parameters were measured and  
407 recorded. Aggregates of individual organoids or those attached to the posts or borders of the central  
408 channel were excluded from the analysis due to irregular geometries. Organoids that appeared unhealthy

409 at baseline were also excluded from the study. The annotated set of organoids were monitored over time  
410 and morphometric changes were analyzed. Organoids with decreasing total area, combined with a sharp  
411 decrease in the circularity measure ( $<0.7$ ) were deemed to be nonviable. Prism software was used for  
412 data visualization and statistical analyses.

413

#### 414 Viability assay for CD8<sup>+</sup> T cells.

415 Real-time viability of T cells in different culture conditions was determined using DRAQ7 dye (Abcam,  
416 ab109202), which selectively fluorescently stains dead cells. Briefly, cells were cultured in media  
417 containing DRAQ7 throughout the duration of the viability assay at a final concentration of 3 $\mu$ M. At each  
418 time point of analysis, T cells in 3D chips were imaged using fluorescence microscopy to quantify the  
419 total number of DRAQ7<sup>+</sup> cells using excitation of 647nm and emission at 681nm. Total live T cell count  
420 was obtained through the quantification of CellTracker<sup>+</sup> cells and total dead cell count was established  
421 through quantification of DRAQ7<sup>+</sup> cells.

422

#### 423 Image analysis for T cell viability assay.

424 Fluorescent images with z-stacks were acquired on a Zeiss inverted microscope. For each chip, images  
425 were acquired to cover the entire area of the central channel (10.5mm X 1.3mm). All the subsequent  
426 image analysis was performed using FIJI image analysis software. Tiles were stitched to recreate the  
427 entire field of view of the central channel using the built-in tiling feature of FIJI. Images were split into the  
428 different color channels. Total number of live cells was calculated using the CellTracker Green<sup>+</sup> cells and  
429 total number of DRAQ7<sup>+</sup> cells yielded the dead cell count. To count cells, all the images from different  
430 conditions were set to the same signal threshold, images were converted to binary format, and the built-  
431 in “analyze particles” plugin feature was used to count the numbers of CellTracker and DRAQ7<sup>+</sup> cells. At  
432 least 3 biological replicates were used for each condition.

433

434

435 *Table S1: qPCR Primers*

|       | Forward                                                     | Reverse                                                         |
|-------|-------------------------------------------------------------|-----------------------------------------------------------------|
| HLA-A | CAG ACG CCG AGG ATG GCC                                     | CAC ACA AGG CAG CTG TCT CAC A                                   |
| HLA-B | TCT CCT CAG ACG CCG AGA TGC;<br>TCT CCT CAG ACG CGG AGA TGC | CTG TCT CAG GCT TTT CAA GCT G                                   |
| HLA-C | TCT CCC CAG ACG CCG AGA TGC;<br>TCT CCC CAG AGG CCG AGA TGC | CTG TCT CAG GCT TTA CAA GCG A;<br>CTG TCT CAG GCT TTA CAA GTG A |

436

437 *Table S2: Antibodies*

| Antibody                          | Company         | Catalog number | Method            |
|-----------------------------------|-----------------|----------------|-------------------|
| Anti-B2M                          | Cell<br>Signals | 12851S         | Microscopy        |
| Anti-rabbit A594                  | Invitrogen      | A11012         | Microscopy        |
| PerCp-Cy5.5 Anti-<br>IFN $\gamma$ | BioLegend       | 502526         | Flow<br>Cytometry |
| BV421 Anti-CD107a                 | BioLegend       | 328637         | Flow<br>Cytometry |

438

## 439 **Acknowledgments**

440 We thank the Ibrahim El-Hefni Liver Biorepository at the California Pacific Medical Center Research  
441 Institute for providing patient tissue samples used to generate liver organoids. We thank John CW Carroll  
442 for help with graphic design. We also thank Dr. Kathryn Claiborn for editorial assistance.

443

## 444 **References**

- 445 1 Ashfaq, U. A., Javed, T., Rehman, S., Nawaz, Z. & Riazuddin, S. An overview of HCV molecular  
446 biology, replication and immune responses. *Virology journal* **8**, 1-10 1743-1422X (2011).  
447 2 Park, S.-H. & Rehermann, B. Immune responses to HCV and other hepatitis viruses. *Immunity*  
448 **40**, 13-24 1074-7613 (2014).  
449 3 Moorman, J. P., Krolkowski, M. R., Mathis, S. M. & Pack, R. P. HIV/HCV Co-infection: burden  
450 of disease and care strategies in Appalachia. *Current HIV/AIDS Reports* **15**, 308-314 1548-3568  
451 (2018).  
452 4 Bailey, J. R., Barnes, E. & Cox, A. L. Approaches, progress, and challenges to hepatitis C  
453 vaccine development. *Gastroenterology* **156**, 418-430 0016-5085 (2019).

- 454 5 Meringer, H., Shibolet, O. & Deutsch, L. Hepatocellular carcinoma in the post-hepatitis C virus  
455 era: Should we change the paradigm? *World journal of gastroenterology* **25**, 3929 (2019).
- 456 6 Duncan, J. D., Urbanowicz, R. A., Tarr, A. W. & Ball, J. K. Hepatitis C Virus Vaccine:  
457 Challenges and Prospects. *Vaccines (Basel)* **8**, doi:10.3390/vaccines8010090 (2020).
- 458 7 Lanford, R. E., Bigger, C., Bassett, S. & Klimpel, G. The chimpanzee model of hepatitis C virus  
459 infections. *ILAR J* **42**, 117-126, doi:10.1093/ilar.42.2.117 (2001).
- 460 8 Cooper, S. *et al.* Analysis of a successful immune response against hepatitis C virus. *Immunity*  
461 **10**, 439-449, doi:10.1016/s1074-7613(00)80044-8 (1999).
- 462 9 Adams, G. *et al.* Natural recovery from acute hepatitis C virus infection by agammaglobulinemic  
463 twin children. *Pediatr Infect Dis J* **16**, 533-534, doi:10.1097/00006454-199705000-00021 (1997).
- 464 10 Cox, A. L. Challenges and promise of a hepatitis C virus vaccine. *Cold Spring Harbor*  
465 *Perspectives in Medicine* **10**, a036947 032157-031422 (2020).
- 466 11 Fraczek, J., Bolleyn, J., Vanhaecke, T., Rogiers, V. & Vinken, M. Primary hepatocyte cultures  
467 for pharmaco-toxicological studies: at the busy crossroad of various anti-dedifferentiation  
468 strategies. *Arch Toxicol* **87**, 577-610, doi:10.1007/s00204-012-0983-3 (2013).
- 469 12 Steinmann, E. & Pietschmann, T. Cell culture systems for hepatitis C virus. *Curr Top Microbiol*  
470 *Immunol* **369**, 17-48, doi:10.1007/978-3-642-27340-7\_2 (2013).
- 471 13 Wakita, T. Cell Culture Systems of HCV Using JFH-1 and Other Strains. *Cold Spring Harb*  
472 *Perspect Med* **9**, doi:10.1101/cshperspect.a036806 (2019).
- 473 14 Wakita, T. *et al.* Production of infectious hepatitis C virus in tissue culture from a cloned viral  
474 genome. *Nat Med* **11**, 791-796, doi:10.1038/nm1268 (2005).
- 475 15 Broutier, L. *et al.* Culture and establishment of self-renewing human and mouse adult liver and  
476 pancreas 3D organoids and their genetic manipulation. *Nature protocols* **11**, 1724 1750-2799  
477 (2016).
- 478 16 Huch, M. *et al.* Long-term culture of genome-stable bipotent stem cells from adult human liver.  
479 *Cell* **160**, 299-312, doi:10.1016/j.cell.2014.11.050 (2015).
- 480 17 Mun, S. J. *et al.* Generation of expandable human pluripotent stem cell-derived hepatocyte-like  
481 liver organoids. *J Hepatol* **71**, 970-985, doi:10.1016/j.jhep.2019.06.030 (2019).
- 482 18 Crignis, E. D. *et al.* Human liver organoids; a patient-derived primary model for HBV Infection  
483 and Related Hepatocellular Carcinoma. *bioRxiv*, 568147, doi:10.1101/568147 (2020).
- 484 19 Wu, X. *et al.* Productive hepatitis C virus infection of stem cell-derived hepatocytes reveals a  
485 critical transition to viral permissiveness during differentiation. *PLoS Pathog* **8**, e1002617,  
486 doi:10.1371/journal.ppat.1002617 (2012).
- 487 20 Schwartz, R. E. *et al.* Modeling hepatitis C virus infection using human induced pluripotent stem  
488 cells. *Proc Natl Acad Sci U S A* **109**, 2544-2548, doi:10.1073/pnas.1121400109 (2012).
- 489 21 Schobel, A., Rosch, K. & Herker, E. Functional innate immunity restricts Hepatitis C Virus  
490 infection in induced pluripotent stem cell-derived hepatocytes. *Sci Rep* **8**, 3893,  
491 doi:10.1038/s41598-018-22243-7 (2018).
- 492 22 Dijkstra, K. K. *et al.* Generation of Tumor-Reactive T Cells by Co-culture of Peripheral Blood  
493 Lymphocytes and Tumor Organoids. *Cell* **174**, 1586-1598 e1512, doi:10.1016/j.cell.2018.07.009  
494 (2018).
- 495 23 Sachs, N. *et al.* Long-term expanding human airway organoids for disease modeling. *EMBO J*  
496 **38**, doi:10.15252/embj.2018100300 (2019).
- 497 24 W, K. *et al.* Hepatitis C Virus Attenuates Interferon-Induced Major Histocompatibility Complex  
498 Class I Expression and Decreases CD8+ T Cell Effector Functions. *Gastroenterology* **146**,  
499 doi:10.1053/j.gastro.2014.01.054 (2014).
- 500 25 Zhang, H. *et al.* Targeting naturally occurring epitope variants of hepatitis C virus with high-  
501 affinity T-cell receptors. *J Gen Virol* **98**, 374-384, doi:10.1099/jgv.0.000656 (2017).
- 502 26 Lopez-Labrador, F. X. *et al.* Genetic variability of hepatitis C virus non-structural protein 3 and  
503 virus-specific CD8+ response in patients with chronic hepatitis C. *J Med Virol* **72**, 575-585,  
504 doi:10.1002/jmv.20036 (2004).



- 505 27 Pavesi, A. *et al.* A 3D microfluidic model for preclinical evaluation of TCR-engineered T cells  
506 against solid tumors. *JCI insight* **2** (2017).
- 507 28 He, Q., Jiang, X., Zhou, X. & Weng, J. Targeting cancers through TCR-peptide/MHC  
508 interactions. *J Hematol Oncol* **12**, 139, doi:10.1186/s13045-019-0812-8 (2019).
- 509 29 Pearlman, A. H. *et al.* Targeting public neoantigens for cancer immunotherapy. *Nature Cancer*  
510 **2**, 487-497, doi:10.1038/s43018-021-00210-y (2021).
- 511 30 Zhang, C. *et al.* Stimulation of hepatitis C virus (HCV) nonstructural protein 3 (NS3) helicase  
512 activity by the NS3 protease domain and by HCV RNA-dependent RNA polymerase. *J Virol* **79**,  
513 8687-8697, doi:10.1128/JVI.79.14.8687-8697.2005 (2005).
- 514 31 He, X. S. *et al.* Quantitative analysis of hepatitis C virus-specific CD8(+) T cells in peripheral  
515 blood and liver using peptide-MHC tetramers. *Proc Natl Acad Sci U S A* **96**, 5692-5697,  
516 doi:10.1073/pnas.96.10.5692 (1999).
- 517

518

519

520

521

522

523

524

525

526

527

528

529

530

531

532

533

534

535

536



537 **Figures**

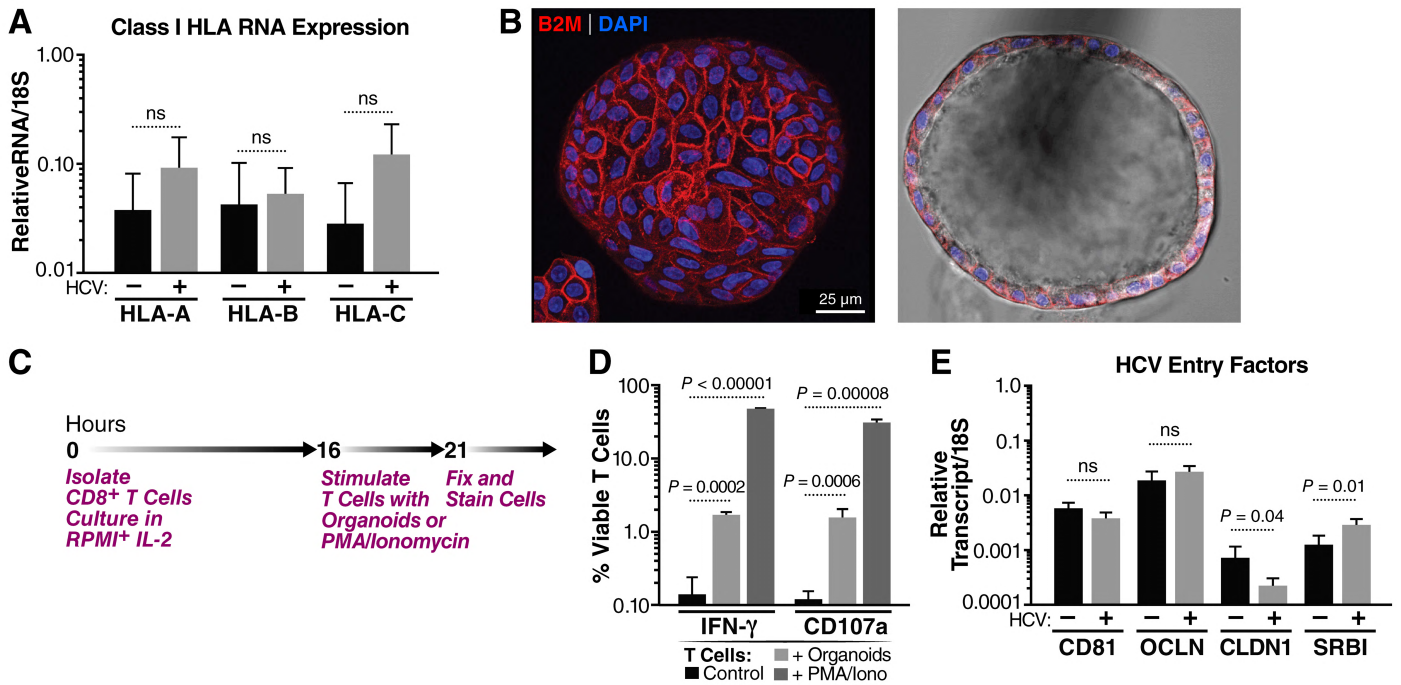

538

539 **Figure 1. Human liver organoids in the stem cell (EM) state express the necessary factors to**  
 540 **interact with CD8<sup>+</sup> T cells and HCV virions. (A)** Expression levels of HLA Class I genes as determined  
 541 by RT-qPCR from HCV- (N=5) and HCV+ (N=4) liver organoids. RNA levels were standardized to the  
 542 18S gene and significance was calculated with an unpaired t-test. NS = not significant. **(B)** Representative  
 543 light sheet images of a liver organoid stained with the pan-class I HLA marker β<sub>2</sub> microglobulin (B2M;  
 544 red) and DAPI (blue). **(C)** Schematic timeline showing the experimental protocol for T cell stimulation. **(D)**  
 545 Expression of IFN-γ and CD107a on CD8<sup>+</sup> T cells stimulated by PMA and ionomyacin or HLA-mismatched  
 546 organoids as measured by flow cytometry and gating on viable CD8<sup>+</sup> T cells. **(E)** Expression levels of  
 547 HCV entry factors CD81, occludin (OCLN), claudin1 (CLDN1) and SRB1 by RT-qPCR from HCV- (N=4)  
 548 and HCV+ (N=5) liver donors. All genes were standardized to 18S and significance was calculated with  
 549 an unpaired t-test. NS = not significant.

Figure 2

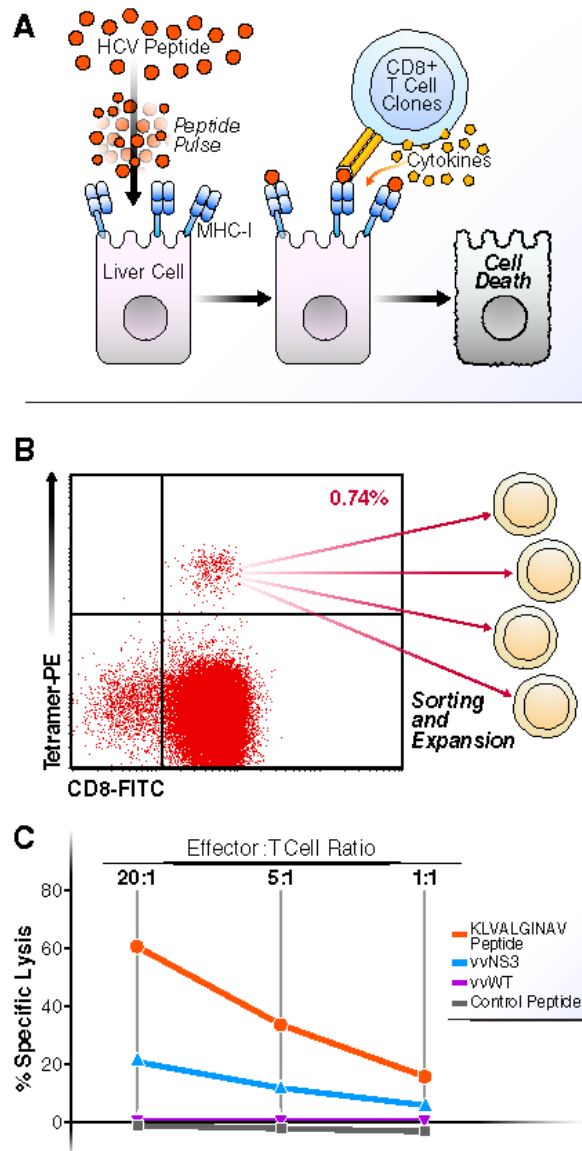

550

551 **Figure 2. HCV antigen-specific lysis of A0201 B cell targets by KLVALGINAV CD8<sup>+</sup> T cell clone**

552 **SR01-78 from an individual with spontaneous resolved HCV. (A) Schematic detailing exogenous**

553 **peptide pulsing of liver cells and stimulation of T cells. (B) Sorting strategy for HCV tetramer positive**

554 **CD8<sup>+</sup> T cells. (C) Chromium release assay demonstrating antigen specific lysis of A0201 class I MHC**

555 **transfected B cell (721.221) exogenously loaded peptide targets (KLVALGINAV and control peptide) and**

556 **endogenously synthesized antigen targets (vvNS3 and control vvWT) at effector to target ratios of 20:1,**

557 **5:1 and 1:1.**

Figure 3

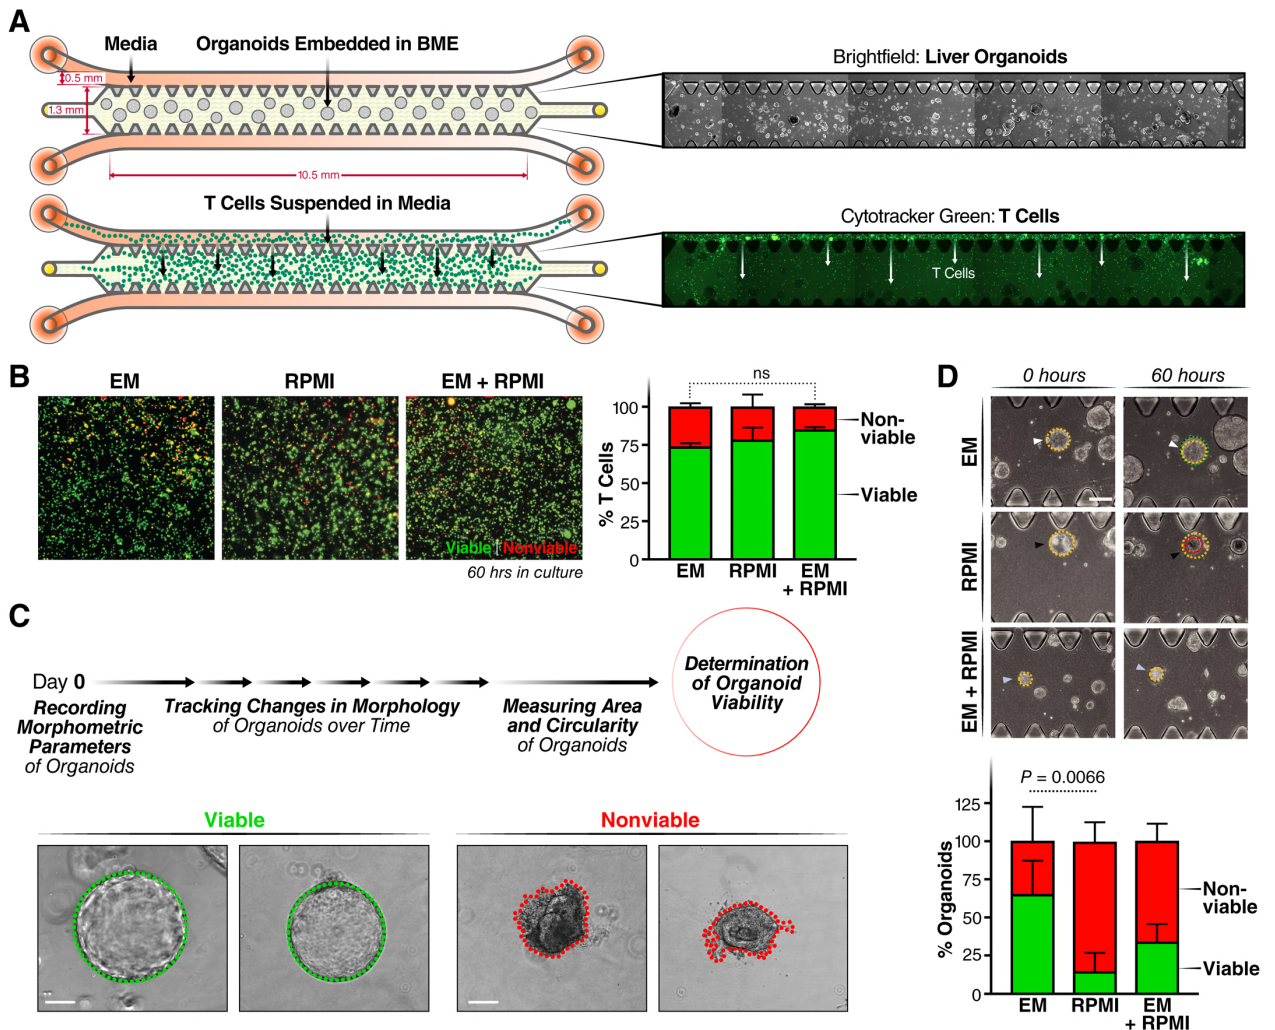

558

559 **Figure 3. Establishing ideal culture conditions for T cells and Liver organoids in microfluidic**

560 **chips. (A)** Schematic detailing the experimental setup for monoculture of organoids and T cells,

561 individually, in 3D microfluidic chips with corresponding microscopy images. The chip is made up of a

562 central channel and 2 media channels on the top and bottom. Organoids are cultured in the middle

563 channel in BME (see brightfield images, right). T cells are loaded into the chip from the media channels

564 and migrate into the BME in the center of the chip driven by pressure gradient (see fluorescent images,

565 right). T cells are tracked by CellTracker Green. **(B)** Quantification of T cell viability in RPMI, EM or

566 RPMI:EM (1:1 volumetric ratio) media. T cells stained with CellTracker (green) are counted as viable

567 cells and DRAQ7+ cells (red) are counted nonviable. **(C)** Organoids are classified as live or dead based

568 on their intact morphology. Green outline (left) indicates healthy organoid with epithelial integrity and red  
569 outline (right) indicates atrophy and loss in viability. **(D)** Organoid survival in 3 media conditions: complete  
570 RPMI, EM and a 1:1 ratio of EM:complete RPMI. Brightfield images of the organoids at 12 and 60 hours  
571 in all media (top). Representative image of the classification of the viability of the organoids in each  
572 condition (left). Quantification was done on three replicates by measuring the area of the organoids. At 0  
573 hours, the area is noted in yellow, and at the bottom the new area is noted with a circle in green (growth),  
574 yellow (same size) and red (smaller).

575

576

577

578

579

580

581

582

583

584

585

586

587

588

589

590

591

592

593



594

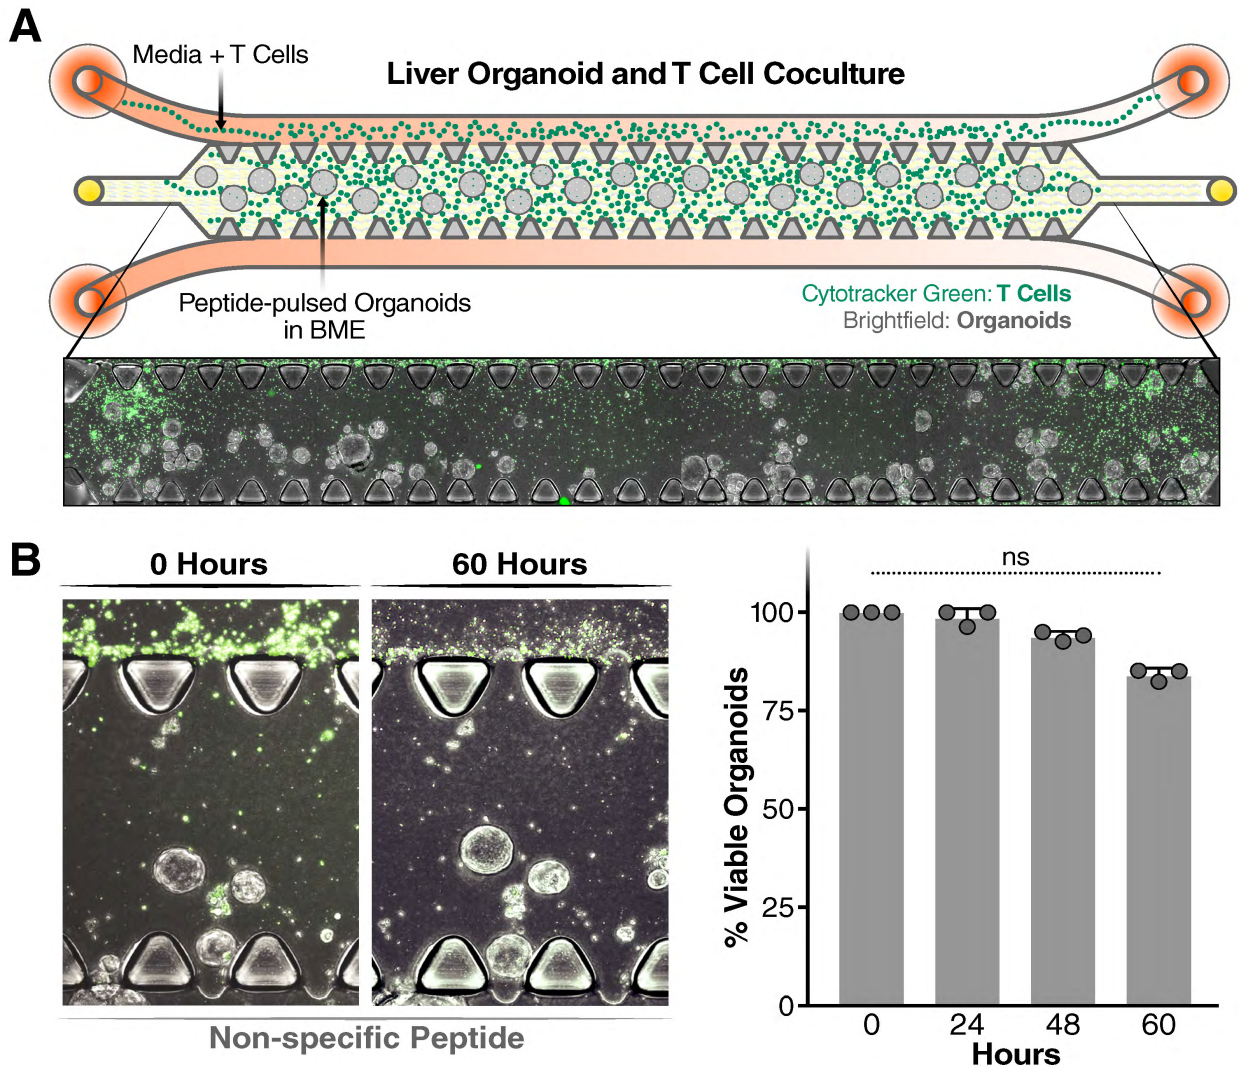

595

596 **Figure 4. Coculture of T cells and liver organoids.** (A) Schematic representation of the liver organoid  
597 and T cell coculture system (top) and representative image of the coculture system in the microfluidic  
598 chip (bottom). (B) Quantification of liver organoid viability after pulsing with peptide with representative  
599 images of the coculture (left) and quantification over 60 hours (right).

600

601

602

Figure 5

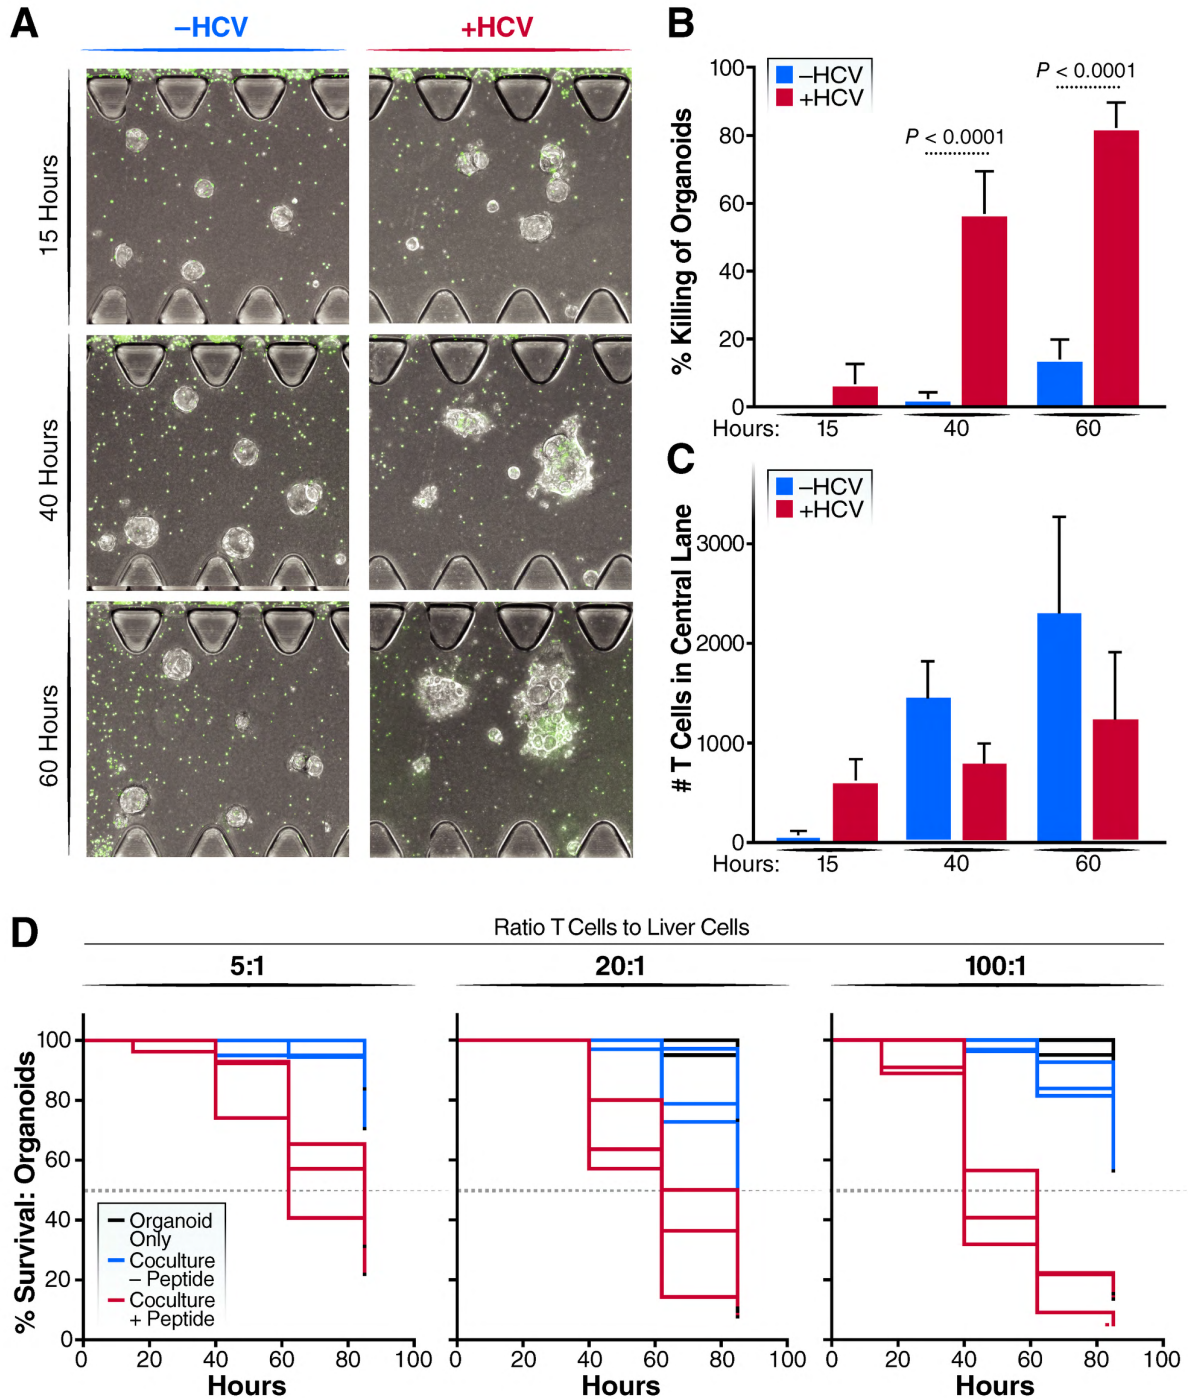

603

604 **Figure 5. T cell killing response. (A)** Representative microscopy image of the effect of T cell-liver

605 organoid interaction with and without the HCV peptide presentation on liver organoids. **(B)** Quantification

606 of viability of pulsed and unpulsed organoids at varying time points at a 100:1 effector to target ratio. **(C)**  
607 Number of T cells in the central channel in pulsed and unpulsed conditions. **(D)** Survival curve of  
608 organoids in monoculture (black), coculture with T cell clones (blue) and coculture with T cell clones after  
609 peptide pulsing (red) in 100:1, 20:1 and 5:1 coculture ratio of T cells to liver cells. Each line represents  
610 one replicate.  
611
